# Supplementary material for: Effect of Arabinoxylan from Wastewater Generated during Vital Wheat Gluten Production on Liver Metabolism in Type 2 Diabetic Mice
Source: MDPI journal article supplement (doi:10.3390/foods12142640), 2023-07-08
Supplement: s1 [file s1]

**Table S1.** Molecular weights and monosaccharide composition of AX.

| Polysaccharides | AX/%  | Molecular Weights | Monosaccharide Compositions                                    |
|-----------------|-------|-------------------|----------------------------------------------------------------|
| AX              | 97.62 | 45745kDa          | Ara: Xyl: Glc: Gal: Man: GalA=39.88:37.92:9.48:7.97:4.08: 0.67 |

Ara, arabinose; Xyl, xylose; Glc, glucose; Gal, galatose; Man, mannose; GalA, galacturonic acid.

**Table S2.** 407 vital metabolites in CON group compared with DM group in hepatic metabolism.

| Metabolites                                               | <i>p</i> -value | Fold<br>Change | VIP    |
|-----------------------------------------------------------|-----------------|----------------|--------|
| Adenosine                                                 | 0.0053          | 4.5860         | 1.5705 |
| Adenosine monophosphate (AMP)                             | 0.0150          | 11.0901        | 1.6126 |
| 1-Butylamine                                              | 0.0096          | 0.9314         | 1.3124 |
| Aminoacetone                                              | 0.0362          | 0.9398         | 1.1613 |
| Glycohyocholic acid                                       | 0.0019          | 9.5737         | 1.6594 |
| Taurine                                                   | 0.0065          | 1.6353         | 1.3779 |
| sn-Glycerol3-phosphate                                    | 0.0009          | 13.2596        | 1.5647 |
| Guanosine-5'-monophosphate                                | 0.0001          | 6.9344         | 1.5811 |
| Adenosine 5'-diphosphate                                  | 0.0005          | 2.5986         | 1.5489 |
| Nicotinamide                                              | 0.0001          | 1.4748         | 1.6194 |
| Xanthosine                                                | 0.0095          | 2.4149         | 1.2058 |
| Glycerophosphocholine                                     | 0.0006          | 3.1948         | 1.4160 |
| L-Pipecolic acid                                          | 0.0000          | 7.4181         | 1.1501 |
| D-Pantothenic acid                                        | 0.0000          | 0.4420         | 1.5736 |
| Dephospho coenzyme a                                      | 0.0058          | 4.8586         | 1.6327 |
| (9S,10E,12Z,15Z)-9-Hydroxy-10,12,15-octadecatrienoic acid | 0.0202          | 0.2116         | 1.5438 |
| Inosine                                                   | 0.0000          | 6.5387         | 1.6792 |
| Guanosine monophosphate                                   | 0.0006          | 8.8482         | 1.6004 |
| ADP                                                       | 0.0008          | 2.2360         | 1.5141 |
| L-Malic acid                                              | 0.0046          | 1.1493         | 1.3972 |
| L-Malic acid                                              | 0.0008          | 1.7072         | 1.5179 |
| Liquiritigenin 4'-[3-acetylapiosyl-(1->2)-glucoside]      | 0.0466          | 6.3861         | 1.4181 |
| Xanthine                                                  | 0.0008          | 0.4962         | 1.5527 |
| L-Ascorbic acid                                           | 0.0354          | 1.5260         | 1.0575 |
| 3-Phosphoglyceric acid                                    | 0.0065          | 0.3330         | 1.3710 |
| Uridine 5'-monophosphate                                  | 0.0005          | 18.4825        | 1.6461 |
| 1-Methyl-L-Histidine                                      | 0.0410          | 3.2775         | 1.3576 |
| Fumaric acid                                              | 0.0055          | 1.3484         | 1.3527 |
| Sphinganine                                               | 0.0002          | 0.5410         | 1.5968 |
| Biliverdin                                                | 0.0092          | 0.5173         | 1.5251 |
| Deoxyinosine                                              | 0.0181          | 0.4004         | 1.2613 |
| 4-Dodecylbenzenesulfonic Acid                             | 0.0074          | 1.5120         | 1.1983 |
| Glucosamine 6-phosphate                                   | 0.0051          | 2.6296         | 1.4201 |
| Adenosine diphosphate ribose                              | 0.0138          | 93.9015        | 1.6492 |
| 3-Dehydrosphinganine                                      | 0.0045          | 0.3903         | 1.6096 |
| Beta-Guanidinopropionic acid                              | 0.0398          | 0.7587         | 1.1372 |
| D-Glucose 6-Phosphate                                     | 0.0453          | 1.2620         | 1.0956 |
| Malic acid                                                | 0.0087          | 1.2974         | 1.3046 |
| Syringol                                                  | 0.0007          | 0.8954         | 1.5007 |
| Isoleucyl-Leucine                                         | 0.0464          | 2.0266         | 1.1861 |

|                                        |        |         |        |
|----------------------------------------|--------|---------|--------|
| Maltotetraose                          | 0.0321 | 10.3547 | 1.5228 |
| S-Adenosyl-L-homocysteine              | 0.0175 | 2.6152  | 1.4628 |
| D(+)-Glucose                           | 0.0019 | 2.1221  | 1.4765 |
| Phaseollidin                           | 0.0054 | 1.3818  | 1.3718 |
| L-Lactic acid                          | 0.0115 | 1.5815  | 1.3228 |
| FAHFA(20:1/20:0)                       | 0.0146 | 0.2431  | 1.3729 |
| FAHFA(18:1/18:0)                       | 0.0008 | 0.3269  | 1.5717 |
| Protoanemonin                          | 0.0015 | 2.3916  | 1.5067 |
| LPG(18:0)                              | 0.0248 | 0.3775  | 1.0805 |
| Lactose                                | 0.0113 | 5.4242  | 1.4800 |
| FAHFA(22:4/22:3)                       | 0.0004 | 0.2512  | 1.5270 |
| L-Threonine                            | 0.0016 | 0.5689  | 1.4678 |
| Hexadecanedioic acid                   | 0.0248 | 0.5998  | 1.1506 |
| Leucyl-phenylalanine                   | 0.0062 | 2.2873  | 1.3989 |
| FAHFA(20:1/22:3)                       | 0.0280 | 0.5120  | 1.2434 |
| Kojibiose                              | 0.0135 | 5.0001  | 1.4359 |
| Acetylphosphate                        | 0.0371 | 0.4237  | 1.1615 |
| FAHFA(18:1/22:3)                       | 0.0069 | 0.6479  | 1.3594 |
| 5-Hydroxyhexanoic acid                 | 0.0206 | 0.2082  | 1.0511 |
| Isoleucyl-Isoleucine                   | 0.0064 | 4.0008  | 1.6068 |
| FAD                                    | 0.0327 | 1.1669  | 1.1231 |
| Galactinol                             | 0.0098 | 8.7695  | 1.4672 |
| Ergothioneine                          | 0.0007 | 25.5138 | 1.7109 |
| LPG(20:4)                              | 0.0012 | 0.4513  | 1.5797 |
| Oxypurinol                             | 0.0185 | 0.6991  | 1.2378 |
| Ononin                                 | 0.0007 | 5.0538  | 1.4022 |
| Prolyl-Methionine                      | 0.0152 | 3.1041  | 1.1824 |
| FAHFA(20:2/22:3)                       | 0.0053 | 0.3938  | 1.2106 |
| 5'-Methylthioadenosine                 | 0.0028 | 4.6667  | 1.5702 |
| D-Erythrose 4-phosphate                | 0.0012 | 5.9621  | 1.2388 |
| LPE(18:0)                              | 0.0009 | 0.4863  | 1.5029 |
| Isobutyrylglycine                      | 0.0025 | 3.1289  | 1.6188 |
| LPE(17:0)                              | 0.0486 | 6.5544  | 1.4454 |
| Cholic acid                            | 0.0207 | 8.9806  | 1.4273 |
| Adenylsuccinic acid                    | 0.0317 | 3.3661  | 1.2902 |
| 4-Hydroxy-2-butenic acid gamma-lactone | 0.0031 | 2.5142  | 1.5353 |
| Salviaflaside methyl ester             | 0.0000 | 6.5804  | 1.6340 |
| Hexylamine                             | 0.0283 | 0.9113  | 1.1883 |
| FAHFA(22:6/22:3)                       | 0.0461 | 0.2053  | 1.2661 |
| Dephospho-CoA                          | 0.0039 | 4.2684  | 1.6321 |
| PG(20:3/22:4)                          | 0.0294 | 0.4560  | 1.1412 |
| 8-Hydroxy-2'-deoxyguanosine            | 0.0122 | 2.4641  | 1.2974 |
| 3'-AMP                                 | 0.0467 | 1.6826  | 1.1143 |
| D-Ribulose 5-phosphate                 | 0.0000 | 4.1590  | 1.6311 |

|                                                     |        |          |        |
|-----------------------------------------------------|--------|----------|--------|
| BMP(18:1/20:3)                                      | 0.0350 | 0.1178   | 1.5597 |
| Adenosine monophosphate                             | 0.0007 | 2.5574   | 1.4946 |
| Butyrylcarnitine                                    | 0.0390 | 1.8661   | 1.1057 |
| LPE(16:1)                                           | 0.0305 | 2.5495   | 1.3601 |
| D-Sedoheptulose 7-phosphate                         | 0.0009 | 2.9059   | 1.2371 |
| Docosahexaenoyl Ethanolamide                        | 0.0004 | 0.2920   | 1.5940 |
| Thiamine monophosphate                              | 0.0000 | 5.9538   | 1.6885 |
| D-Xylose                                            | 0.0058 | 1.7363   | 1.3780 |
| S-adenosyl-L-methionine                             | 0.0072 | 5.5534   | 1.5271 |
| Adenine                                             | 0.0076 | 2.9924   | 1.6191 |
| PG(18:1/20:4)                                       | 0.0204 | 0.1946   | 1.6021 |
| Arachidonic acid                                    | 0.0006 | 0.5460   | 1.5789 |
| Docosapentaenoic acid (22n-3)                       | 0.0025 | 0.3809   | 1.4304 |
| BMP(18:1/22:4)                                      | 0.0275 | 0.2706   | 1.2523 |
| Stearoylethanolamide                                | 0.0007 | 0.4809   | 1.5007 |
| Dehydroascorbic acid                                | 0.0027 | 1.3672   | 1.4613 |
| BMP(18:2/20:3)                                      | 0.0340 | 0.1653   | 1.5502 |
| Hydroxypropyl-Leucine                               | 0.0040 | 2.4833   | 1.3460 |
| PE(16:1e/20:4)                                      | 0.0217 | 0.6761   | 1.1681 |
| PS(16:2/24:4)                                       | 0.0415 | 0.5063   | 1.3123 |
| PG(18:1/20:2)                                       | 0.0257 | 0.0764   | 1.1617 |
| PG(18:2/22:5)                                       | 0.0316 | 0.4764   | 1.3410 |
| L-Gulonic gamma-lactone                             | 0.0003 | 1.8072   | 1.4947 |
| Epsilon-(gamma-Glutamyl)-lysine                     | 0.0106 | 0.2088   | 1.6284 |
| LysoPC(22:5(4Z,7Z,10Z,13Z,16Z))                     | 0.0123 | 1.3665   | 1.2875 |
| D-4'-Phosphopantothenate                            | 0.0030 | 0.2007   | 1.6124 |
| 6-Phosphogluconic acid                              | 0.0007 | 2.8332   | 1.4880 |
| 4-Chloro-3,5-dimethoxybenzyl alcohol                | 0.0174 | 0.8624   | 1.3153 |
| Graveoline                                          | 0.0067 | 2.3372   | 1.1863 |
| 7-Ketodeoxycholic acid                              | 0.0393 | 166.9213 | 1.5163 |
| LPC(17:1)                                           | 0.0381 | 2.5123   | 1.3839 |
| PG(20:4/22:5)                                       | 0.0187 | 0.2560   | 1.4995 |
| (9xi,10xi,12xi)-9,10-Dihydroxy-12-octadecenoic acid | 0.0047 | 0.4901   | 1.3763 |
| Isoleucyl-Methionine                                | 0.0136 | 2.7906   | 1.2459 |
| Raffinose                                           | 0.0201 | 12.1627  | 1.5407 |
| 5-Methylcytidine                                    | 0.0201 | 7.7518   | 1.5702 |
| Phytosphingosine                                    | 0.0066 | 0.5472   | 1.3673 |
| H-PHE-PRO-OH                                        | 0.0095 | 2.3983   | 1.4822 |
| PG(22:4/22:5)                                       | 0.0160 | 0.3767   | 1.4837 |
| MG(18:2(9Z,12Z)/0:0/0:0)                            | 0.0242 | 0.2331   | 1.5145 |
| Retinal                                             | 0.0009 | 2.5950   | 1.6500 |
| 8-HETE                                              | 0.0000 | 3.3620   | 1.6651 |
| Dihydrotestosterone                                 | 0.0012 | 3.9085   | 1.6481 |
| Prostaglandin E2                                    | 0.0382 | 0.3333   | 1.1258 |

|                                                                          |        |         |        |
|--------------------------------------------------------------------------|--------|---------|--------|
| Maleamic acid                                                            | 0.0021 | 1.5079  | 1.4628 |
| 3'-O-Methyl-D-adenosine                                                  | 0.0249 | 2.3986  | 1.3606 |
| BMP(20:4/22:6)                                                           | 0.0160 | 1.3546  | 1.2493 |
| Palmitoleoyl Ethanolamide                                                | 0.0130 | 0.3387  | 1.5627 |
| ACar(20:3)                                                               | 0.0294 | 0.4059  | 1.1551 |
| 16(17)-EpDPE                                                             | 0.0089 | 0.2733  | 1.4872 |
| Pseudouridine                                                            | 0.0095 | 1.8468  | 1.3706 |
| Folinic acid                                                             | 0.0051 | 3.3111  | 1.5445 |
| 2-Furanmethanol                                                          | 0.0148 | 1.7136  | 1.3017 |
| Aspartame                                                                | 0.0078 | 0.5488  | 1.3831 |
| BMP(20:3/20:4)                                                           | 0.0065 | 0.3069  | 1.4204 |
| ACar(16:4)                                                               | 0.0206 | 8.8553  | 1.3280 |
| 2-(3-Phenylpropyl)pyridine                                               | 0.0064 | 0.8722  | 1.3439 |
| Lysyl-Leucine                                                            | 0.0469 | 1.8171  | 1.0581 |
| Androstanediol                                                           | 0.0000 | 4.2827  | 1.6375 |
| p-Cresol glucuronide                                                     | 0.0281 | 2.5152  | 1.1962 |
| Hinokitiol;beta-Thujaplicin                                              | 0.0049 | 0.2391  | 1.6021 |
| 9,10-epoxyoctadecanoic acid                                              | 0.0051 | 0.2333  | 1.6195 |
| Phenylalanyl-Valine                                                      | 0.0135 | 2.0739  | 1.2871 |
| beta-D-Glucosamine                                                       | 0.0421 | 1.6374  | 1.1852 |
| Valyl-Arginine                                                           | 0.0320 | 3.5406  | 1.4812 |
| Glutaminylytyrosine                                                      | 0.0178 | 1.6507  | 1.1900 |
| (3R, 6'Z)-3,4-Dihydro-8-hydroxy-3-(6-pentadecenyl)-1H-2-benzopyran-1-one | 0.0032 | 15.9467 | 1.5251 |
| PI(20:3(5Z,8Z,11Z)/16:0)                                                 | 0.0034 | 0.2451  | 1.2726 |
| 2,4,5,7alpha-Tetrahydro-1,4,4,7a-tetramethyl-1H-inden-2-ol               | 0.0315 | 1.3526  | 1.2153 |
| Lysyl-Hydroxyproline                                                     | 0.0174 | 1.6422  | 1.2197 |
| Methionyl-Alanine                                                        | 0.0045 | 0.6429  | 1.3877 |
| PC(2:0/16:2)                                                             | 0.0091 | 0.3057  | 1.5149 |
| L-Erythrulose                                                            | 0.0015 | 1.9275  | 1.4819 |
| ACRL Toxin II                                                            | 0.0018 | 0.0372  | 1.4894 |
| Maltohexaose                                                             | 0.0189 | 7.8123  | 1.5445 |
| Stearoylglycine                                                          | 0.0012 | 0.0786  | 1.6191 |
| OxPG(18:1/18:1+3O)                                                       | 0.0171 | 0.1542  | 1.5797 |
| 3-Indoleacrylic acid                                                     | 0.0431 | 0.7984  | 1.1357 |
| Trigonelline                                                             | 0.0001 | 3.2699  | 1.6427 |
| Glucosylisomaltol                                                        | 0.0145 | 6.0834  | 1.3770 |
| BMP(22:4/22:6)                                                           | 0.0011 | 0.5418  | 1.4039 |
| PEtOH(16:1/18:2)                                                         | 0.0469 | 9.5960  | 1.5526 |
| PC(2:0/20:2)                                                             | 0.0220 | 1.8206  | 1.2530 |
| p-Mentha-1,8-dien-7-ol                                                   | 0.0456 | 0.9300  | 1.0978 |
| FAHFA(20:2/18:0)                                                         | 0.0091 | 0.1920  | 1.5445 |
| β-Alanine                                                                | 0.0329 | 0.6743  | 1.3143 |
| Amylopectin                                                              | 0.0200 | 8.9439  | 1.4011 |
| 29-Norcycloartane-3,24-dione                                             | 0.0233 | 0.1075  | 1.4539 |

|                                              |        |         |        |
|----------------------------------------------|--------|---------|--------|
| Hyperoside                                   | 0.0442 | 0.3955  | 1.0794 |
| FAHFA(18:1/3:0)                              | 0.0211 | 0.2156  | 1.4218 |
| CPA(18:0/0:0)                                | 0.0013 | 0.3303  | 1.3611 |
| 2-(3-Phenylpropyl)tetrahydrofuran            | 0.0435 | 0.8216  | 1.0976 |
| Diosmetin                                    | 0.0270 | 1.9614  | 1.0623 |
| Methyl 2-(10-heptadecenyl)-6-hydroxybenzoate | 0.0221 | 0.2740  | 1.4473 |
| Sciadonic acid                               | 0.0027 | 73.5528 | 1.6689 |
| 5-Aminopentanal                              | 0.0153 | 0.6963  | 1.3007 |
| PG(18:1/22:4)                                | 0.0195 | 0.1992  | 1.5140 |
| 8,9-DiHETrE                                  | 0.0000 | 0.2786  | 1.4898 |
| Hydrocortisone                               | 0.0088 | 0.1870  | 1.4631 |
| Trehalose                                    | 0.0032 | 3.6062  | 1.4363 |
| 2-Furoic acid                                | 0.0199 | 1.9686  | 1.3154 |
| 4,8,12-Trimethyltridecanoyl-CoA              | 0.0297 | 0.4474  | 1.1365 |
| 2-Aminoheptanedioic acid                     | 0.0298 | 2.5413  | 1.2285 |
| Maltopentaose                                | 0.0254 | 6.0121  | 1.4684 |
| N-Arachidonoyl GABA                          | 0.0019 | 17.5236 | 1.5674 |
| Troxilin B3                                  | 0.0047 | 29.0071 | 1.6878 |
| trans-Octadec-2-enoyl-CoA                    | 0.0021 | 0.5828  | 1.4399 |
| Uracil                                       | 0.0000 | 0.2002  | 1.5639 |
| LPS(20:1)                                    | 0.0344 | 2.2704  | 1.0040 |
| O-Phosphoethanolamine                        | 0.0262 | 0.6175  | 1.2019 |
| 16-Hydroxy hexadecanoic acid                 | 0.0427 | 0.7047  | 1.1530 |
| PG(18:2/22:4)                                | 0.0027 | 0.3230  | 1.4881 |
| 6-Phosphonoglucono-D-lactone                 | 0.0003 | 3.6077  | 1.5891 |
| Tyrosyl-Proline                              | 0.0069 | 1.7832  | 1.3732 |
| Polyoxyethylene (600) monoricinoleate        | 0.0038 | 0.5542  | 1.4213 |
| LysoPC(17:0)                                 | 0.0086 | 0.4597  | 1.3105 |
| PG(20:4/22:4)                                | 0.0008 | 0.3429  | 1.5711 |
| Glycitin                                     | 0.0186 | 5.0229  | 1.4768 |
| Coenzyme A                                   | 0.0009 | 4.0107  | 1.4740 |
| PG(16:0/20:4)                                | 0.0265 | 0.3506  | 1.3521 |
| PC(12:0/22:2)                                | 0.0476 | 0.5595  | 1.2330 |
| Ethyl glucuronide                            | 0.0074 | 6.1315  | 1.6063 |
| indolin-2-one                                | 0.0254 | 1.7748  | 1.1985 |
| PG(18:0/20:4)                                | 0.0088 | 0.3474  | 1.5615 |
| ( $\Delta^8$ )-8(9)-EET Ethanolamide         | 0.0048 | 8.4402  | 1.5375 |
| Dihydro-3-(1-octenyl)-2,5-furandione         | 0.0000 | 4.2171  | 1.5723 |
| L-Alanyl-L-Glutamine                         | 0.0482 | 4.9293  | 1.1259 |
| 5-HETE                                       | 0.0058 | 4.0609  | 1.6399 |
| Abscisic acid                                | 0.0012 | 0.8785  | 1.4866 |
| FAHFA(16:0/3:0)                              | 0.0002 | 0.3530  | 1.4559 |
| N-Hexadecanoylpyrrolidine                    | 0.0006 | 0.4885  | 1.5061 |
| FAHFA(16:0/22:3)                             | 0.0142 | 0.6983  | 1.3321 |

|                                                                             |        |          |        |
|-----------------------------------------------------------------------------|--------|----------|--------|
| Pyridoxal 5'-phosphate                                                      | 0.0198 | 4.3057   | 1.4049 |
| Hexadecanedioic acid mono-L-carnitine ester                                 | 0.0309 | 14.5315  | 1.5469 |
| 15-HETE                                                                     | 0.0271 | 0.2914   | 1.4372 |
| BMP(20:3/22:5)                                                              | 0.0091 | 0.2736   | 1.5359 |
| BMP(20:3/22:6)                                                              | 0.0057 | 0.2805   | 1.4682 |
| Deoxyguanosine                                                              | 0.0015 | 5.1921   | 1.5231 |
| LPS(18:0)                                                                   | 0.0088 | 0.7461   | 1.3512 |
| PG(18:1/22:6)                                                               | 0.0045 | 0.3227   | 1.4726 |
| Lactodifucotetraose                                                         | 0.0085 | 1.9567   | 1.3784 |
| LysoPC(O-18:0)                                                              | 0.0004 | 0.3592   | 1.5968 |
| (8E,15E)-1,8,15-Heptadecatriene-11,13-diyne                                 | 0.0374 | 0.8080   | 1.1488 |
| 1-Oleoylglycerophosphoinositol                                              | 0.0387 | 0.7459   | 1.1085 |
| 7alpha-Hydroxy-3-oxo-5beta-cholan-24-oic acid                               | 0.0286 | 6.8821   | 1.2618 |
| PG(18:1/20:3)                                                               | 0.0205 | 0.1980   | 1.5999 |
| BMP(18:2/22:4)                                                              | 0.0136 | 0.2933   | 1.2720 |
| 3-Methyl-5-pentyl-2-furanundecanoic acid                                    | 0.0194 | 8.4838   | 1.2626 |
| Eicosadienoic acid                                                          | 0.0047 | 0.4966   | 1.3160 |
| PA(2:0/18:0)                                                                | 0.0307 | 0.0580   | 1.5243 |
| 7-Aminomethyl-7-carbaguanine                                                | 0.0371 | 2.0089   | 1.3199 |
| PC(14:1/24:4)                                                               | 0.0080 | 0.7197   | 1.3167 |
| Biochanin A                                                                 | 0.0225 | 68.2332  | 1.6251 |
| PI(18:1/20:4)                                                               | 0.0046 | 0.5750   | 1.2522 |
| PI(18:0/20:4)                                                               | 0.0103 | 0.6276   | 1.5059 |
| 5-Hydroxyflavone                                                            | 0.0000 | 11.6555  | 1.4534 |
| beta-D-Galactopyranosyl-(1->2)-[beta-D-galactopyranosyl-(1->4)]-D-galactose | 0.0198 | 12.2566  | 1.5439 |
| alpha-Terpinyol anthranilate                                                | 0.0120 | 2.2958   | 1.2537 |
| PI(16:1/20:4)                                                               | 0.0214 | 1.5867   | 1.2021 |
| 3-Hydroxychavicol 1-[rhamnosyl-(1->6)-glucoside]                            | 0.0132 | 3.2353   | 1.4006 |
| PG(16:0/22:6)                                                               | 0.0200 | 0.3294   | 1.4488 |
| 15-Deoxy-d-12,14-PGJ2                                                       | 0.0216 | 0.2710   | 1.3053 |
| gamma-Aminobutyric acid                                                     | 0.0056 | 0.3186   | 1.2886 |
| H-GLU(ALA-OH)-OH                                                            | 0.0208 | 1.8054   | 1.2002 |
| 13S-hydroxyoctadecadienoic acid                                             | 0.0002 | 0.2562   | 1.5542 |
| 4-(Trimethylammonio)butanoate                                               | 0.0037 | 4.5640   | 1.6471 |
| 16-Methylheptadecanoic acid                                                 | 0.0000 | 0.5928   | 1.6486 |
| 4-Aminoantipyrine                                                           | 0.0242 | 0.8985   | 1.1736 |
| 5,10-Methylene-THF                                                          | 0.0263 | 14.4678  | 1.5593 |
| NAD                                                                         | 0.0250 | 1.8702   | 1.4081 |
| 7a,12a-Dihydroxy-5a-cholestan-3-one                                         | 0.0015 | 0.4128   | 1.4140 |
| Alanyl-Leucine                                                              | 0.0017 | 2.1294   | 1.5099 |
| 6,7,4'-Trihydroxyisoflavone                                                 | 0.0347 | 528.8381 | 1.6310 |
| PE(18:1e/20:4)                                                              | 0.0081 | 0.3430   | 1.2599 |
| Perilloside C                                                               | 0.0034 | 0.2610   | 1.2377 |
| trans-Zeatin-riboside                                                       | 0.0004 | 3.1508   | 1.5293 |

|                                                         |        |          |        |
|---------------------------------------------------------|--------|----------|--------|
| Norchalciporyl propionate                               | 0.0377 | 0.2451   | 1.1348 |
| Traumatin                                               | 0.0000 | 2.5232   | 1.6639 |
| Taurocholic acid                                        | 0.0210 | 2.2173   | 1.2182 |
| Tetradecanedioic acid                                   | 0.0217 | 0.5291   | 1.2261 |
| D-Pinitol                                               | 0.0024 | 0.4949   | 1.4572 |
| 11Z-Eicosenoic acid                                     | 0.0046 | 0.4855   | 1.3755 |
| PI(20:4/20:4)                                           | 0.0001 | 0.2747   | 1.6322 |
| 3-beta-Glucosylcellotriose                              | 0.0296 | 7.9135   | 1.4941 |
| LPI(18:0)                                               | 0.0001 | 0.5266   | 1.5401 |
| LPS(22:2)                                               | 0.0180 | 0.2906   | 1.5016 |
| PG(16:3/22:6)                                           | 0.0413 | 0.3772   | 1.4091 |
| Isosalsolidine                                          | 0.0051 | 0.0681   | 1.2371 |
| PC(14:0e/4:0)                                           | 0.0244 | 0.6844   | 1.2177 |
| 1'-O-Acetylpaxilline                                    | 0.0002 | 13.5743  | 1.6505 |
| Mangiferdesmethylursanone                               | 0.0016 | 0.2244   | 1.4445 |
| Tryptophyl-Asparagine                                   | 0.0256 | 2.3058   | 1.1830 |
| PI(18:1/18:1)                                           | 0.0119 | 0.6160   | 1.2916 |
| Cytochalasin Ppho                                       | 0.0338 | 2.1670   | 1.1746 |
| LPI(20:3)                                               | 0.0264 | 0.4722   | 1.1792 |
| Indoxyl sulfate                                         | 0.0025 | 2.4377   | 1.4016 |
| 5-Hydroxythalidomide                                    | 0.0018 | 6.9142   | 1.6130 |
| Pantetheine 4'-phosphate                                | 0.0103 | 3.1573   | 1.5829 |
| Adenosine phosphosulfate                                | 0.0024 | 1.6999   | 1.4465 |
| Vanilloloside                                           | 0.0150 | 2.1315   | 1.3343 |
| L-2-Amino-5-hydroxypentanoic acid                       | 0.0302 | 1.6710   | 1.0708 |
| Dihydroceramide                                         | 0.0429 | 0.9184   | 1.1024 |
| beta-Citraurin epoxide                                  | 0.0423 | 7.0273   | 1.5249 |
| Monomethyl glutaric acid                                | 0.0368 | 2.2751   | 1.2886 |
| Tyrosyl-Tryptophan                                      | 0.0316 | 1.7282   | 1.0992 |
| L-phenylalanyl-L-hydroxyproline                         | 0.0042 | 5.6128   | 1.6373 |
| Palmitic acid                                           | 0.0014 | 1.9062   | 1.5334 |
| Maslinic acid                                           | 0.0469 | 736.7340 | 1.7001 |
| Ercalcitriol                                            | 0.0142 | 0.2505   | 1.5097 |
| Diethylphosphate                                        | 0.0137 | 0.8569   | 1.2682 |
| 11,14,17-Eicosatrienoic acid                            | 0.0016 | 0.3084   | 1.4988 |
| Agrocybenine                                            | 0.0334 | 0.8951   | 1.1457 |
| Pentosidine                                             | 0.0142 | 1.7146   | 1.2800 |
| LysoPA(18:1(9Z)/0:0)                                    | 0.0024 | 0.5181   | 1.4222 |
| Acetylleucine                                           | 0.0314 | 2.2984   | 1.3091 |
| Oxoadipic acid                                          | 0.0006 | 2.1758   | 1.3851 |
| Uridine 5'-diphosphoglucuronic acid (UDP-D-glucuronate) | 0.0467 | 3.6267   | 1.3830 |
| Ginkgolide A                                            | 0.0007 | 0.3452   | 1.0091 |
| Chrysin                                                 | 0.0414 | 72.0146  | 1.4830 |
| Lansiumamide A                                          | 0.0060 | 113.7913 | 1.6266 |



|                                                                                              |        |         |        |
|----------------------------------------------------------------------------------------------|--------|---------|--------|
| PS(20:4(5Z,8Z,11Z,14Z)/22:2(13Z,16Z))                                                        | 0.0135 | 0.2320  | 1.5451 |
| Isovalerylglutamic acid                                                                      | 0.0195 | 0.9000  | 1.2953 |
| Mutatoxanthin                                                                                | 0.0443 | 0.4596  | 1.2579 |
| Maltotriose                                                                                  | 0.0144 | 10.3445 | 1.5198 |
| Isoliquiritigenin                                                                            | 0.0225 | 0.4561  | 1.4627 |
| Carnosic acid                                                                                | 0.0012 | 2.4733  | 1.5218 |
| (3beta,23E)-3-Hydroxy-27-norcycloart-23-en-25-one                                            | 0.0000 | 0.2418  | 1.5312 |
| Fenugreekine                                                                                 | 0.0207 | 1.4377  | 1.2300 |
| 3-Hydroxysebacic acid                                                                        | 0.0205 | 0.3264  | 1.2793 |
| PI(18:1(9Z)/18:1(9Z))                                                                        | 0.0106 | 0.2421  | 1.5320 |
| 5,6-DHET                                                                                     | 0.0014 | 0.5052  | 1.4177 |
| Pyridine                                                                                     | 0.0027 | 1.2992  | 1.4379 |
| Butyramide                                                                                   | 0.0174 | 1.2007  | 1.2079 |
| Lysyl-Glycine                                                                                | 0.0014 | 8.0989  | 1.6465 |
| Sissotrin                                                                                    | 0.0113 | 5.8647  | 1.4626 |
| Adrenic acid                                                                                 | 0.0002 | 0.4422  | 1.5127 |
| 13-OxoODE                                                                                    | 0.0149 | 0.1210  | 1.6549 |
| Cis-zeatin-O-glucoside                                                                       | 0.0051 | 51.5360 | 1.6964 |
| S-(Formylmethyl)glutathione                                                                  | 0.0026 | 8.7268  | 1.6546 |
| PG(18:1(11Z)/20:3(5Z,8Z,11Z))                                                                | 0.0438 | 0.0247  | 1.4493 |
| Umbelliprenin                                                                                | 0.0438 | 0.4335  | 1.1857 |
| Dihydrojasmonic acid                                                                         | 0.0196 | 1.0842  | 1.2499 |
| (5a,6a,8a,11a)-8-Hydroxy-2-oxo-1(10),3-guaiadien-12,6-olide-15-al 8-(4-hydroxyphenylacetate) | 0.0009 | 0.4241  | 1.4271 |
| 10-Hydroxymelleolide                                                                         | 0.0045 | 0.1881  | 1.6603 |
| Schidigeragenin C                                                                            | 0.0116 | 2.4725  | 1.2525 |
| Alline                                                                                       | 0.0091 | 0.8596  | 1.3020 |
| (6b,7b,13R)-6,7-Diacetoxy-8,14-labdadiene-13-ol                                              | 0.0264 | 6.9469  | 1.4036 |
| PGD2 ethanolamide                                                                            | 0.0189 | 0.3381  | 1.4883 |
| Phenylalanyl-Lysine                                                                          | 0.0484 | 2.5028  | 1.2339 |
| Rosmarinic acid                                                                              | 0.0000 | 5.5625  | 1.6153 |
| 4-Methoxy-5-(3,7,11,15-tetramethyl-2,6,10,14-hexadecatetraenyl)-1,3-benzenediol              | 0.0109 | 14.6125 | 1.6156 |
| 2',7'-Dihydroxy-4'-methoxy-8-prenylflavan 2',7'-diglucoside                                  | 0.0128 | 0.7313  | 1.2727 |
| Eicosapentaenoic acid                                                                        | 0.0010 | 0.5217  | 1.5283 |
| Vitamin A                                                                                    | 0.0000 | 4.7079  | 1.6619 |
| Diethylhexyl adipate                                                                         | 0.0317 | 1.3782  | 1.0889 |
| CPA(18:1(9Z)/0:0)                                                                            | 0.0301 | 0.7214  | 1.1336 |
| Inositol cyclic phosphate                                                                    | 0.0182 | 2.3693  | 1.4280 |
| PS(20:3(8Z,11Z,14Z)/22:2(13Z,16Z))                                                           | 0.0090 | 0.2068  | 1.3273 |
| 14R,15S-EpETrE                                                                               | 0.0001 | 0.3863  | 1.4371 |
| PG(18:1(11Z)/22:5(4Z,7Z,10Z,13Z,16Z))                                                        | 0.0241 | 0.2031  | 1.4286 |
| 2-Methyl-1,3-cyclohexadiene                                                                  | 0.0377 | 0.7958  | 1.1283 |
| (3beta,22R,23R,24S)-3,22,23-Trihydroxystigmastan-6-one                                       | 0.0000 | 0.2068  | 1.5987 |
| 2,6-Dimethoxy-4-propylphenol                                                                 | 0.0005 | 3.6375  | 1.4768 |
| Methyl 2,3,6-tri-O-galloyl-beta-D-glucopyranoside                                            | 0.0000 | 3.3817  | 1.5426 |

|                                                                                                    |        |         |        |
|----------------------------------------------------------------------------------------------------|--------|---------|--------|
| 1,1'-[1,12-Dodecanediylbis(oxy)]bisbenzene                                                         | 0.0217 | 7.7387  | 1.3824 |
| 5-Methyl-2,4-bis(3-methyl-2-butenyl)-6-(2-methyl-1-oxopropyl)-5-(4-methyl-3-pentenyl)cyclohexanone | 0.0278 | 0.2019  | 1.4129 |
| Tyrosyl-Histidine                                                                                  | 0.0183 | 3.3919  | 1.4193 |
| Prolyl-Valine                                                                                      | 0.0276 | 2.0812  | 1.1052 |
| ADP-ribose 2'-phosphate                                                                            | 0.0037 | 2.4009  | 1.3503 |
| 6-(alpha-D-Glucosaminy)-1D-myo-inositol                                                            | 0.0152 | 3.9270  | 1.4690 |
| 3'-Sialyllactose                                                                                   | 0.0304 | 5.0322  | 1.3778 |
| Clupanodonyl carnitine                                                                             | 0.0132 | 0.3135  | 1.2409 |
| Fragransin B2                                                                                      | 0.0056 | 8.1260  | 1.4432 |
| Suberylglycine                                                                                     | 0.0043 | 71.6142 | 1.7085 |
| Progesterone                                                                                       | 0.0223 | 4.3075  | 1.5182 |
| Polysorbate 60                                                                                     | 0.0001 | 0.2456  | 1.4464 |
| N-cis-Feruloyltyramine                                                                             | 0.0005 | 2.3762  | 1.5270 |
| Demethoxyfumitremorgin C                                                                           | 0.0205 | 0.0002  | 1.6913 |
| Mizolastine                                                                                        | 0.0000 | 0.7923  | 1.6703 |
| Tyrosyl-Alanine                                                                                    | 0.0187 | 3.1771  | 1.2894 |
| Gyrocyanin                                                                                         | 0.0354 | 0.7228  | 1.1751 |
| PI(20:3(5Z,8Z,11Z)/18:0)                                                                           | 0.0001 | 0.6212  | 1.5868 |
| Parathion                                                                                          | 0.0207 | 0.5041  | 1.3093 |
| Silibinin                                                                                          | 0.0116 | 0.1916  | 1.6463 |
| Cholesterol sulfate                                                                                | 0.0002 | 0.3329  | 1.5494 |
| APC                                                                                                | 0.0012 | 0.4954  | 1.4376 |
| Citicoline                                                                                         | 0.0254 | 1.7427  | 1.1961 |
| 3-Glucosyl-2,3',4,4',6-pentahydroxybenzophenone                                                    | 0.0056 | 5.2503  | 1.4139 |
| Macelignan                                                                                         | 0.0014 | 0.4527  | 1.5044 |
| Glycocholic acid                                                                                   | 0.0170 | 6.9025  | 1.4201 |
| d-Tocotrienol                                                                                      | 0.0025 | 47.0597 | 1.6194 |
| (3beta,5alpha,6beta,9alpha,22E,24R)-23-Methylergosta-7,22-diene-3,5,6,9-tetrol                     | 0.0052 | 0.1621  | 1.6146 |
| Ethyl tetradecanoate                                                                               | 0.0377 | 0.7688  | 1.1607 |
| LysoPC(14:1(9Z))                                                                                   | 0.0180 | 0.1315  | 1.5839 |
| Epinephrine sulfate                                                                                | 0.0421 | 0.8642  | 1.1042 |
| DHAP(18:0e)                                                                                        | 0.0000 | 5.5699  | 1.4928 |
| Yuccaol C                                                                                          | 0.0037 | 7.4929  | 1.4398 |
| Apo-12'-violaxanthal                                                                               | 0.0001 | 0.8950  | 1.6009 |
| Phosphoric acid                                                                                    | 0.0030 | 3.9946  | 1.6633 |
| 5-Ethoxysorgoleone 358                                                                             | 0.0104 | 0.3718  | 1.2974 |
| Propylene glycol alginate                                                                          | 0.0001 | 3.4928  | 1.4270 |
| Sebacic acid                                                                                       | 0.0348 | 0.5900  | 1.2213 |
| Zymonic acid                                                                                       | 0.0433 | 0.6930  | 1.1229 |
| (3beta,5alpha,9alpha,22E,24R)-3,5,9-Trihydroxy-23-methylergosta-7,22-dien-6-one                    | 0.0191 | 0.3675  | 1.2484 |
| Oxazepam                                                                                           | 0.0005 | 0.7379  | 1.5385 |
| Vignatic acid A                                                                                    | 0.0051 | 0.2595  | 1.4317 |
| Resveratrol                                                                                        | 0.0003 | 0.6375  | 1.5877 |
| Aromadendrin                                                                                       | 0.0366 | 0.7630  | 1.1461 |

|                                                          |        |        |        |
|----------------------------------------------------------|--------|--------|--------|
| Methyl 5-hydroxyoxindole-3-acetate                       | 0.0295 | 2.2318 | 1.1458 |
| 2-(a-Hydroxyethyl)thiamine diphosphate                   | 0.0276 | 5.9558 | 1.3743 |
| Protoporphyrin IX                                        | 0.0448 | 4.4060 | 1.2005 |
| Musanolone C                                             | 0.0005 | 0.7709 | 1.5228 |
| PC-M5'                                                   | 0.0137 | 2.2671 | 1.2549 |
| 8-Hydroxy-deoxyguanosine                                 | 0.0042 | 0.5069 | 1.4485 |
| PG(18:2(9Z,12Z))/22:6(4Z,7Z,10Z,13Z,16Z,19Z))            | 0.0496 | 0.4909 | 1.3012 |
| PG(16:1(9Z))/18:0)                                       | 0.0125 | 7.3186 | 1.6286 |
| BR-Xanthone B                                            | 0.0021 | 0.2798 | 1.3042 |
| 2-Chloro-5-methylmaleylacetate                           | 0.0118 | 0.6457 | 1.2516 |
| (3xi,7(11)Z)-7(11)-Copaene-4,12-diol                     | 0.0167 | 0.1405 | 1.5667 |
| Nevskin                                                  | 0.0122 | 0.2005 | 1.4419 |
| Pregnenolone                                             | 0.0002 | 5.9182 | 1.3110 |
| 1',2'-Dihydro-1,1'-dimethyl-2'-oxo-4,4'-bipyridinium(1+) | 0.0000 | 0.4924 | 1.5871 |
| Prostaglandin A2                                         | 0.0026 | 2.2341 | 1.4472 |

**Table S3.** 167 vital metabolites in Met group compared with DM group in hepatic metabolism.

| Metabolites                                          | P-VALUE | FOLD CHANGE | VIP    |
|------------------------------------------------------|---------|-------------|--------|
| Adenosine                                            | 0.0033  | 2.9490      | 1.8460 |
| Adenosine monophosphate (AMP)                        | 0.0205  | 4.9769      | 1.8219 |
| Hypoxanthine                                         | 0.0037  | 1.5418      | 1.8083 |
| Norvaline                                            | 0.0436  | 1.4013      | 1.2484 |
| 5'-Inosinic acid                                     | 0.0393  | 6.0389      | 1.8481 |
| Guanosine-5'-monophosphate                           | 0.0328  | 5.4981      | 1.8679 |
| Adenosine 5'-diphosphate                             | 0.0023  | 2.0637      | 1.8795 |
| Nicotinamide                                         | 0.0309  | 1.2274      | 1.4809 |
| Glycerophosphocholine                                | 0.0039  | 3.2948      | 1.8725 |
| L-Pipecolic acid                                     | 0.0412  | 2.6319      | 1.2067 |
| D-Pantothenic acid                                   | 0.0000  | 0.3897      | 2.2205 |
| Dephospho coenzyme a                                 | 0.0302  | 3.2788      | 1.7747 |
| Inosine                                              | 0.0001  | 3.6754      | 2.1247 |
| Guanosine monophosphate                              | 0.0262  | 6.0567      | 1.8357 |
| Adenosine 3',5'-diphosphate                          | 0.0058  | 1.6977      | 1.7559 |
| ADP                                                  | 0.0024  | 1.8788      | 1.8637 |
| L-Malic acid                                         | 0.0345  | 1.1613      | 1.4445 |
| Liquiritigenin 4'-[3-acetylapiosyl-(1->2)-glucoside] | 0.0304  | 3.3399      | 1.6328 |
| Xanthine                                             | 0.0080  | 0.5739      | 2.0538 |
| L-Ascorbic acid                                      | 0.0023  | 1.5685      | 1.8717 |
| 3-Phosphoglyceric acid                               | 0.0086  | 0.3101      | 1.7510 |
| Uridine 5'-monophosphate                             | 0.0278  | 10.1086     | 1.9565 |
| Fumaric acid                                         | 0.0305  | 1.3118      | 1.5550 |
| Glucosamine 6-phosphate                              | 0.0051  | 2.1352      | 1.8558 |
| Uric acid                                            | 0.0407  | 0.1508      | 1.9851 |

|                                 |        |         |        |
|---------------------------------|--------|---------|--------|
| D-Glucose 6-Phosphate           | 0.0360 | 1.2269  | 1.4872 |
| Guanine                         | 0.0005 | 2.1343  | 1.9641 |
| Maltotetraose                   | 0.0278 | 3.7471  | 1.5966 |
| S-Adenosyl-L-homocysteine       | 0.0009 | 2.4136  | 2.0222 |
| 4-Pyridoxic acid                | 0.0012 | 0.4709  | 1.8858 |
| Lactose                         | 0.0197 | 2.9507  | 1.5910 |
| L-Threonine                     | 0.0078 | 0.6655  | 1.6468 |
| Hexadecanedioic acid            | 0.0138 | 0.6534  | 1.6928 |
| Kojibiose                       | 0.0263 | 2.7558  | 1.5276 |
| Acetylphosphate                 | 0.0272 | 0.3018  | 1.5742 |
| Galactinol                      | 0.0144 | 3.6901  | 1.5583 |
| LPG(20:4)                       | 0.0183 | 1.7154  | 1.8014 |
| Oxypurinol                      | 0.0224 | 0.7402  | 1.6716 |
| LPE(20:4)                       | 0.0447 | 1.3710  | 1.4460 |
| Ononin                          | 0.0028 | 3.7319  | 1.7750 |
| 5'-Methylthioadenosine          | 0.0017 | 3.7787  | 2.0115 |
| D-Erythrose 4-phosphate         | 0.0006 | 10.1077 | 1.6721 |
| PC(20:4/22:6)                   | 0.0096 | 0.6095  | 1.6174 |
| LPE(17:1)                       | 0.0030 | 10.6696 | 2.1152 |
| LPE(17:0)                       | 0.0156 | 32.4627 | 2.1442 |
| Salviaflaside methyl ester      | 0.0001 | 4.2031  | 2.0825 |
| LPG(18:1)                       | 0.0481 | 1.6334  | 1.5945 |
| Riboflavin                      | 0.0332 | 0.7236  | 1.5980 |
| Dephospho-CoA                   | 0.0209 | 3.1206  | 1.8584 |
| 8-Hydroxy-2'-deoxyguanosine     | 0.0005 | 2.7992  | 2.0024 |
| 3'-AMP                          | 0.0430 | 3.4239  | 1.6815 |
| D-Ribulose 5-phosphate          | 0.0026 | 1.8946  | 1.8449 |
| Adenosine monophosphate         | 0.0031 | 2.5210  | 1.8259 |
| Docosahexaenoyl Ethanolamide    | 0.0028 | 0.4809  | 2.0282 |
| Thiamine monophosphate          | 0.0085 | 3.1674  | 1.9591 |
| D-Xylose                        | 0.0462 | 1.5573  | 1.3876 |
| LPC(22:4)                       | 0.0402 | 1.9695  | 1.4498 |
| S-adenosyl-L-methionine         | 0.0224 | 4.8855  | 1.9507 |
| Adenine                         | 0.0080 | 1.9821  | 1.9687 |
| Stearoylethanolamide            | 0.0451 | 1.3346  | 1.5502 |
| Dehydroascorbic acid            | 0.0009 | 1.4977  | 1.9625 |
| LPC(22:3)                       | 0.0077 | 1.2842  | 1.7710 |
| LysoPE(16:0/0:0)                | 0.0045 | 1.6843  | 1.8593 |
| Epsilon-(gamma-Glutamyl)-lysine | 0.0426 | 0.5411  | 1.6221 |
| D-4'-Phosphopantothenate        | 0.0006 | 0.2449  | 2.0540 |
| Graveoline                      | 0.0193 | 2.2448  | 1.5893 |
| Oleoyl glycine                  | 0.0119 | 2.1278  | 1.1006 |
| PC(2:0/17:0)                    | 0.0212 | 3.9932  | 1.7670 |
| 3-Methylglutaryl carnitine      | 0.0176 | 6.6145  | 1.7861 |

|                                                                             |        |        |        |
|-----------------------------------------------------------------------------|--------|--------|--------|
| Raffinose                                                                   | 0.0201 | 5.6406 | 1.7910 |
| 5-Methylcytidine                                                            | 0.0483 | 6.3699 | 1.8687 |
| LPE(22:6)                                                                   | 0.0163 | 1.3638 | 1.5656 |
| Retinal                                                                     | 0.0345 | 2.2795 | 1.6415 |
| PEtOH(16:1/20:4)                                                            | 0.0001 | 8.3247 | 1.6668 |
| 8-HETE                                                                      | 0.0378 | 2.7545 | 1.7659 |
| Dihydrotestosterone                                                         | 0.0267 | 2.5250 | 1.8034 |
| L-L-Homoglutathione                                                         | 0.0028 | 1.9653 | 1.9142 |
| Maleamic acid                                                               | 0.0489 | 1.2559 | 1.3747 |
| 16(17)-EpDPE                                                                | 0.0354 | 0.5271 | 1.4649 |
| Pseudouridine                                                               | 0.0171 | 1.3824 | 1.6964 |
| N,N-Dimethylsphingosine                                                     | 0.0077 | 1.2712 | 1.8641 |
| L-Erythrulose                                                               | 0.0435 | 1.5214 | 1.3846 |
| ACRL Toxin II                                                               | 0.0484 | 0.5438 | 1.4199 |
| ACar(21:2)                                                                  | 0.0391 | 0.2474 | 1.3446 |
| UDP-N-acetyl-alpha-D-galactosamine                                          | 0.0353 | 5.7494 | 1.9727 |
| 7-Methylguanine                                                             | 0.0081 | 1.6118 | 1.4948 |
| Stearoylglycine                                                             | 0.0022 | 0.4114 | 1.9502 |
| Glucosylisomaltol                                                           | 0.0281 | 3.0642 | 1.4724 |
| PEtOH(16:1/18:2)                                                            | 0.0154 | 7.5177 | 2.0537 |
| Ethylbenzene                                                                | 0.0314 | 1.1550 | 1.5441 |
| $\beta$ -Alanine                                                            | 0.0417 | 0.6960 | 1.4449 |
| Amylopectin                                                                 | 0.0085 | 4.0253 | 1.5674 |
| Trehalose                                                                   | 0.0325 | 2.1887 | 1.4625 |
| 2-Aminoheptanedioic acid                                                    | 0.0098 | 6.2651 | 1.8860 |
| Maltopentaose                                                               | 0.0209 | 3.0664 | 1.4854 |
| Uracil                                                                      | 0.0004 | 0.5192 | 2.0443 |
| 6-Phosphonoglucono-D-lactone                                                | 0.0113 | 1.9044 | 1.6839 |
| Ethyl glucuronide                                                           | 0.0067 | 6.9070 | 2.1152 |
| Dihydro-3-(1-octenyl)-2,5-furandione                                        | 0.0208 | 2.3758 | 1.5103 |
| 1-Kestose                                                                   | 0.0233 | 6.8825 | 1.5928 |
| FAHFA(16:0/3:0)                                                             | 0.0425 | 0.6891 | 1.5117 |
| Deoxyguanosine                                                              | 0.0049 | 3.7796 | 1.7969 |
| Lactodifucotetraose                                                         | 0.0166 | 2.0213 | 1.8257 |
| Dexamethasone                                                               | 0.0074 | 6.6240 | 1.7988 |
| 1-Oleoylglycerophosphoinositol                                              | 0.0007 | 0.6979 | 1.9924 |
| PC(2:0/20:3)                                                                | 0.0340 | 2.6050 | 1.3754 |
| Geniposide                                                                  | 0.0154 | 2.1139 | 1.9208 |
| PI(18:1/20:4)                                                               | 0.0293 | 0.6739 | 1.3937 |
| 5-Hydroxyflavone                                                            | 0.0000 | 7.7477 | 1.7984 |
| beta-D-Galactopyranosyl-(1->2)-[beta-D-galactopyranosyl-(1->4)]-D-galactose | 0.0226 | 5.9881 | 1.8006 |
| Acetylhomoserine                                                            | 0.0320 | 1.4539 | 1.4893 |
| LPA(16:1)                                                                   | 0.0082 | 2.0144 | 1.7722 |
| PC(22:4(7Z,10Z,13Z,16Z)/18:2(9Z,12Z))                                       | 0.0304 | 0.7315 | 1.6082 |

|                                                         |        |         |        |
|---------------------------------------------------------|--------|---------|--------|
| 4-(Trimethylammonio)butanoate                           | 0.0162 | 2.3727  | 1.7952 |
| 5,10-Methylene-THF                                      | 0.0105 | 6.9716  | 2.0920 |
| NAD                                                     | 0.0162 | 1.2882  | 1.5751 |
| Tetradecanedioic acid                                   | 0.0252 | 0.5393  | 1.6428 |
| PI(20:4/20:4)                                           | 0.0017 | 0.3950  | 1.8933 |
| 3-beta-Glucosylcellotriose                              | 0.0203 | 2.9883  | 1.4498 |
| LPI(18:0)                                               | 0.0003 | 0.7560  | 2.0902 |
| PG(16:3/22:6)                                           | 0.0428 | 2.0757  | 1.5019 |
| Tryptophyl-Asparagine                                   | 0.0366 | 2.4871  | 1.5183 |
| Piceatannol 4'-galloylglucoside                         | 0.0062 | 1.8799  | 1.7958 |
| PE(14:0/22:4(7Z,10Z,13Z,16Z))                           | 0.0224 | 1.2405  | 1.5360 |
| Adenosine phosphosulfate                                | 0.0022 | 1.7666  | 1.9297 |
| LPC(24:4)                                               | 0.0365 | 1.3580  | 1.2029 |
| beta-Citraurin epoxide                                  | 0.0180 | 38.9425 | 2.1501 |
| Monomethyl glutaric acid                                | 0.0312 | 1.9765  | 1.5766 |
| Ercalcitriol                                            | 0.0361 | 0.4264  | 1.8237 |
| 1-heptadecanoyl-glycero-3-phosphate                     | 0.0018 | 2.9234  | 1.8714 |
| Leukotriene B4                                          | 0.0094 | 0.6102  | 1.8653 |
| Acetylleucine                                           | 0.0299 | 1.6626  | 1.4957 |
| LysoPE(24:6(6Z,9Z,12Z,15Z,18Z,21Z)/0:0)                 | 0.0387 | 2.2139  | 1.5186 |
| Oxadipic acid                                           | 0.0379 | 1.5428  | 1.3984 |
| Uridine 5'-diphosphoglucuronic acid (UDP-D-glucuronate) | 0.0021 | 3.2932  | 1.9554 |
| rac-Normetanephrene                                     | 0.0152 | 0.7887  | 1.6673 |
| Maltotriose                                             | 0.0213 | 6.2386  | 1.7587 |
| Fenugreekine                                            | 0.0186 | 1.3346  | 1.6298 |
| 5,6-DHET                                                | 0.0119 | 0.5672  | 1.6883 |
| Butyramide                                              | 0.0426 | 1.3925  | 1.4875 |
| Gentiatibetine                                          | 0.0112 | 1.2520  | 1.6777 |
| (R)-lipoic acid                                         | 0.0184 | 1.5879  | 1.6512 |
| Rosmarinic acid                                         | 0.0032 | 3.4785  | 1.9627 |
| Eicosapentaenoic acid                                   | 0.0060 | 0.6039  | 1.8436 |
| Vitamin A                                               | 0.0400 | 2.6276  | 1.6993 |
| CPA(18:1(9Z)/0:0)                                       | 0.0388 | 1.5332  | 1.6144 |
| Inositol cyclic phosphate                               | 0.0012 | 1.7205  | 1.8987 |
| 14R,15S-EpETrE                                          | 0.0057 | 0.5149  | 1.8034 |
| Methyl 2,3,6-tri-O-galloyl-beta-D-glucopyranoside       | 0.0005 | 2.7497  | 1.9743 |
| Tyrosyl-Histidine                                       | 0.0378 | 2.1557  | 1.2299 |
| 6-(alpha-D-Glucosaminy)-1D-myo-inositol                 | 0.0230 | 2.4409  | 1.5921 |
| 3'-Sialyllactose                                        | 0.0491 | 3.9066  | 1.4672 |
| LysoPA(16:0/0:0)                                        | 0.0133 | 1.2627  | 1.6459 |
| Eujambolin                                              | 0.0115 | 0.1532  | 1.8121 |
| N-cis-Feruloyltyramine                                  | 0.0018 | 2.2388  | 1.9758 |
| APC                                                     | 0.0428 | 0.6779  | 1.4322 |
| Macelignan                                              | 0.0129 | 0.5547  | 1.5944 |

|                                                          |        |        |        |
|----------------------------------------------------------|--------|--------|--------|
| Leukotriene C4                                           | 0.0118 | 0.6644 | 1.8476 |
| Yuccaol C                                                | 0.0270 | 5.6156 | 1.6784 |
| 2,5-Dihydro-2,4,5-trimethyloxazole                       | 0.0016 | 0.8256 | 1.8797 |
| Palmitoyl Serinol                                        | 0.0057 | 1.2150 | 1.7526 |
| Resveratrol                                              | 0.0248 | 0.7253 | 1.5672 |
| CDP-Ethanolamine                                         | 0.0238 | 2.1163 | 1.7569 |
| Physagulin F                                             | 0.0467 | 0.7379 | 1.4979 |
| Nevskin                                                  | 0.0266 | 0.4317 | 1.6586 |
| 1',2'-Dihydro-1,1'-dimethyl-2'-oxo-4,4'-bipyridinium(1+) | 0.0000 | 0.4214 | 2.2265 |
| LysoPE(22:5(4Z,7Z,10Z,13Z,16Z)/0:0)                      | 0.0197 | 1.7434 | 1.6986 |

**Table S4.** 139 vital metabolites in AX400 group compared with DM group in hepatic metabolism.

| Metabolites                 | P-VALUE | FOLD CHANGE | VIP    |
|-----------------------------|---------|-------------|--------|
| Hypoxanthine                | 0.0016  | 1.7063      | 2.0406 |
| L-Phenylalanine             | 0.0324  | 0.7969      | 1.5328 |
| D-Proline                   | 0.0149  | 0.7430      | 1.8102 |
| D-Pantothenic acid          | 0.0004  | 0.4445      | 1.9049 |
| Dephospho coenzyme a        | 0.0385  | 2.1502      | 1.7857 |
| Inosine                     | 0.0019  | 3.1488      | 2.1082 |
| Adenosine 3',5'-diphosphate | 0.0363  | 1.6664      | 1.7135 |
| Xanthine                    | 0.0030  | 0.5631      | 2.0246 |
| Guanosine diphosphate       | 0.0389  | 1.8966      | 1.2318 |
| Uric acid                   | 0.0377  | 0.1301      | 2.0853 |
| DL-Phenylalanine            | 0.0052  | 0.7215      | 1.8093 |
| Guanine                     | 0.0022  | 2.6160      | 1.9863 |
| 4-Pyridoxic acid            | 0.0008  | 0.4507      | 2.0367 |
| 5-Aminovaleric acid         | 0.0030  | 1.0963      | 2.0205 |
| FAHFA(22:4/22:3)            | 0.0419  | 0.5194      | 1.2146 |
| FAD                         | 0.0312  | 1.2219      | 1.5463 |
| Ergothioneine               | 0.0077  | 1.4366      | 1.8517 |
| Valyl-Leucine               | 0.0462  | 0.6521      | 1.4674 |
| Oxypurinol                  | 0.0079  | 0.6452      | 1.9144 |
| Ononin                      | 0.0122  | 3.2759      | 1.6687 |
| FAHFA(20:2/22:3)            | 0.0356  | 0.6246      | 1.4926 |
| 5'-Methylthioadenosine      | 0.0003  | 2.9195      | 2.0370 |
| D-Erythrose 4-phosphate     | 0.0001  | 9.6211      | 1.7796 |
| LPE(17:1)                   | 0.0137  | 12.3206     | 2.1495 |
| LPE(17:0)                   | 0.0024  | 33.0937     | 2.2639 |
| Salviaflaside methyl ester  | 0.0007  | 4.1152      | 2.1042 |
| Dephospho-CoA               | 0.0240  | 2.2843      | 1.8907 |
| 8-Hydroxy-2'-deoxyguanosine | 0.0046  | 3.2687      | 1.9859 |
| 3'-AMP                      | 0.0134  | 2.0883      | 1.9162 |
| PC(22:6e/7:0)               | 0.0417  | 2.0505      | 1.6030 |

|                                         |        |         |        |
|-----------------------------------------|--------|---------|--------|
| Docosaehaenoyl Ethanolamide             | 0.0241 | 0.6190  | 1.7301 |
| Thiamine monophosphate                  | 0.0027 | 2.1702  | 1.9682 |
| S-adenosyl-L-methionine                 | 0.0005 | 3.0893  | 1.9753 |
| Arachidonic acid                        | 0.0468 | 0.7781  | 1.4292 |
| LPC(15:0)                               | 0.0366 | 1.3613  | 1.6377 |
| LPC(22:3)                               | 0.0479 | 1.1335  | 1.5492 |
| N6-Carbamoyl-L-threonyladenosine        | 0.0235 | 0.8104  | 1.6657 |
| Epsilon-(gamma-Glutamyl)-lysine         | 0.0411 | 0.4812  | 1.9530 |
| D-4'-Phosphopantothenate                | 0.0034 | 0.4116  | 1.9101 |
| 4-Chloro-3,5-dimethoxybenzyl alcohol    | 0.0096 | 1.0748  | 1.8847 |
| Oleoyl glycine                          | 0.0356 | 2.2404  | 1.2070 |
| Symmetric dimethylarginine              | 0.0185 | 0.6631  | 1.6086 |
| Retinal                                 | 0.0341 | 1.6616  | 1.8512 |
| PEtOH(16:1/20:4)                        | 0.0062 | 6.5372  | 1.5094 |
| 8-HETE                                  | 0.0013 | 1.6451  | 2.0069 |
| Dihydrotestosterone                     | 0.0269 | 1.4294  | 1.6360 |
| L-L-Homoglutathione                     | 0.0269 | 1.3451  | 1.5391 |
| Pseudouridine                           | 0.0088 | 1.4764  | 1.8973 |
| ACar(20:2)                              | 0.0041 | 0.3015  | 1.8586 |
| 2-Furanmethanol                         | 0.0116 | 1.8313  | 1.8577 |
| 9,10-epoxyoctadecanoic acid             | 0.0173 | 0.5480  | 1.5778 |
| Rishitin                                | 0.0487 | 1.1569  | 1.6400 |
| LPC(20:4)                               | 0.0174 | 0.3108  | 1.9794 |
| ACRL Toxin II                           | 0.0128 | 0.5393  | 1.8089 |
| UDP-N-acetyl-alpha-D-galactosamine      | 0.0156 | 2.3877  | 1.9040 |
| PEtOH(16:1/18:2)                        | 0.0178 | 9.7610  | 2.1270 |
| L-Valine                                | 0.0114 | 0.6842  | 1.7128 |
| LPC(18:3)                               | 0.0306 | 1.3795  | 1.5598 |
| p-Mentha-1,8-dien-7-ol                  | 0.0130 | 1.0658  | 1.7990 |
| FAHFA(18:1/3:0)                         | 0.0481 | 0.3736  | 1.5726 |
| Sciadonic acid                          | 0.0060 | 30.6505 | 2.2387 |
| 2-Aminoheptanedioic acid                | 0.0013 | 5.3079  | 1.9584 |
| N-Arachidonoyl GABA                     | 0.0003 | 9.7043  | 2.0417 |
| Uracil                                  | 0.0005 | 0.5862  | 2.1515 |
| 2,4,6-Octatriynoic acid                 | 0.0329 | 0.8181  | 1.5068 |
| Polyoxyethylene (600) monoricinoleate   | 0.0279 | 1.4362  | 1.5372 |
| Coenzyme A                              | 0.0291 | 2.5732  | 1.6996 |
| Ethyl glucuronide                       | 0.0001 | 3.8125  | 2.1665 |
| ( $\Delta^{\pm}$ )8(9)-EET Ethanolamide | 0.0033 | 7.9762  | 2.1278 |
| Astragalin                              | 0.0301 | 0.3854  | 1.5693 |
| Austroinulin                            | 0.0104 | 51.8625 | 2.1471 |
| FAHFA(16:0/3:0)                         | 0.0209 | 0.6340  | 1.7112 |
| 9,10-DHOME                              | 0.0479 | 0.6394  | 1.4334 |
| Lactodifucotetraose                     | 0.0162 | 1.6446  | 1.7943 |



|                                                              |        |         |        |
|--------------------------------------------------------------|--------|---------|--------|
| Dexamethasone                                                | 0.0211 | 5.7225  | 1.8611 |
| 3-Methyl-5-pentyl-2-furanundecanoic acid                     | 0.0057 | 10.1230 | 1.7475 |
| PA(2:0/18:0)                                                 | 0.0475 | 0.1887  | 1.9575 |
| Cappariloside A                                              | 0.0137 | 0.6703  | 1.6489 |
| 5-Hydroxyflavone                                             | 0.0010 | 7.9554  | 1.8272 |
| 3-Hydroxy-carbofuran                                         | 0.0397 | 0.5193  | 1.6801 |
| PE(18:1/20:4)                                                | 0.0347 | 0.7805  | 1.5646 |
| 13S-hydroxyoctadecadienoic acid                              | 0.0211 | 0.6603  | 1.6961 |
| Dioscorine                                                   | 0.0257 | 1.2135  | 1.6464 |
| 5,10-Methylene-THF                                           | 0.0103 | 4.0234  | 2.2153 |
| Adrenosterone                                                | 0.0338 | 0.2510  | 2.0675 |
| Perilloside C                                                | 0.0421 | 0.4924  | 1.1823 |
| Mesaconic acid                                               | 0.0457 | 0.4890  | 1.8026 |
| Cannabidiol                                                  | 0.0087 | 0.5157  | 1.8513 |
| D-Pinitol                                                    | 0.0113 | 0.5224  | 1.7660 |
| PI(20:4/20:4)                                                | 0.0078 | 0.5809  | 1.8754 |
| Isosalsolidine                                               | 0.0365 | 0.4326  | 1.1515 |
| 4-Oxo-2-nonenal                                              | 0.0310 | 2.1303  | 1.7130 |
| LPI(20:3)                                                    | 0.0123 | 0.5981  | 1.8951 |
| Piceatannol 4'-galloylglucoside                              | 0.0070 | 2.0322  | 1.8992 |
| Pantetheine 4'-phosphate                                     | 0.0023 | 2.3051  | 2.2023 |
| beta-Citraurin epoxide                                       | 0.0038 | 39.4845 | 2.2851 |
| L-phenylalanyl-L-hydroxyproline                              | 0.0482 | 2.8403  | 1.9377 |
| 1-heptadecanoyl-glycero-3-phosphate                          | 0.0301 | 1.9227  | 1.5057 |
| LysoPI(18:0/0:0)                                             | 0.0307 | 0.6852  | 1.5247 |
| Arginyl-Methionine                                           | 0.0347 | 2.1860  | 1.6751 |
| Leukotriene B4                                               | 0.0474 | 0.7041  | 1.5596 |
| rac-Normetanephrene                                          | 0.0075 | 0.7961  | 1.8793 |
| dIMP                                                         | 0.0287 | 0.5492  | 1.6192 |
| 2-hydroxydesipramine                                         | 0.0273 | 0.7256  | 1.5852 |
| Undecanoic acid                                              | 0.0450 | 0.6577  | 1.4828 |
| 3,4-Dihydrocoumarin                                          | 0.0191 | 0.7109  | 1.6608 |
| 5,6-DHET                                                     | 0.0022 | 0.5293  | 1.9152 |
| Butyramide                                                   | 0.0427 | 1.4838  | 1.7493 |
| Cis-zeatin-O-glucoside                                       | 0.0088 | 2.6425  | 1.9593 |
| Gentiatibetine                                               | 0.0098 | 1.2424  | 1.8140 |
| xi-3-Hydroxy-5-phenylpentanoic acid O-beta-D-Glucopyranoside | 0.0022 | 1.5494  | 1.8977 |
| 10-Hydroxymelleolide                                         | 0.0497 | 0.5658  | 1.5732 |
| Calabaxanthone                                               | 0.0369 | 2.2481  | 1.3345 |
| Rosmarinic acid                                              | 0.0083 | 3.4301  | 1.9806 |
| Behenic acid                                                 | 0.0151 | 1.8616  | 1.1793 |
| Octadecanedioic acid                                         | 0.0025 | 2.2214  | 1.9503 |
| Eicosapentaenoic acid                                        | 0.0215 | 0.6990  | 1.5797 |
| Vitamin A                                                    | 0.0103 | 1.6269  | 1.8265 |

|                                                          |        |         |        |
|----------------------------------------------------------|--------|---------|--------|
| 14R,15S-EpETrE                                           | 0.0004 | 0.6290  | 2.1127 |
| (3beta,22R,23R,24S)-3,22,23-Trihydroxystigmastan-6-one   | 0.0223 | 0.6633  | 1.7517 |
| Methyl 2,3,6-tri-O-galloyl-beta-D-glucopyranoside        | 0.0004 | 2.8560  | 2.0236 |
| N-cis-Feruloyltyramine                                   | 0.0093 | 2.2083  | 1.9375 |
| Demethoxyfunitremorgin C                                 | 0.0196 | 2.2781  | 1.5186 |
| cis-3-Hexenyl lactate                                    | 0.0148 | 0.6982  | 1.8249 |
| Diacetone alcohol                                        | 0.0496 | 0.8587  | 1.4498 |
| Citicoline                                               | 0.0033 | 2.6624  | 2.0304 |
| Macelignan                                               | 0.0307 | 0.5506  | 1.5838 |
| d-Tocotrienol                                            | 0.0080 | 21.2782 | 2.1100 |
| Leukotriene C4                                           | 0.0117 | 0.5856  | 1.7457 |
| Epinephrine sulfate                                      | 0.0266 | 0.8415  | 1.5571 |
| (3S,5R,6R,7E)-3,5,6-Trihydroxy-7-megastigmen-9-one       | 0.0089 | 1.3436  | 1.8318 |
| Zymonic acid                                             | 0.0222 | 1.3761  | 1.5921 |
| Resveratrol                                              | 0.0002 | 0.5222  | 2.0647 |
| Aromadendrin                                             | 0.0321 | 0.7712  | 1.5187 |
| CDP-Ethanolamine                                         | 0.0024 | 1.9955  | 1.9728 |
| Protoporphyrin IX                                        | 0.0256 | 2.2178  | 1.6208 |
| Cyclotetradecane                                         | 0.0046 | 1.1004  | 1.8867 |
| 1',2'-Dihydro-1,1'-dimethyl-2'-oxo-4,4'-bipyridinium(1+) | 0.0003 | 0.4755  | 1.9496 |
| Ganolucidic acid E                                       | 0.0010 | 0.5354  | 1.9312 |
